# Supplementary material for: Identification of shared fatty acid metabolism related signatures in dilated cardiomyopathy and myocardial infarction
Source: Future Sci OA. 2023 Mar 28;9(3):FSO847. doi: 10.2144/fsoa-2023-0008 (PMC10088053; doi:10.2144/fsoa-2023-0008)
Supplement: Supplementary file 2 [file fsoa-09-847-s2.xls]

## Sheet: GSE21610
id	vad status:	disease status:	vad type	age	gender
GSM545657	vad status: unsupported	disease status: none	vad: none	age: 18	gender: f
GSM545658	vad status: unsupported	disease status: none	vad: none	age: 40	gender: m
GSM545659	vad status: unsupported	disease status: none	vad: none	age: 5	gender: m
GSM545660	vad status: unsupported	disease status: none	vad: none	age: 28	gender: m
GSM545661	vad status: unsupported	disease status: none	vad: none	age: 64	gender: m
GSM545662	vad status: unsupported	disease status: none	vad: none	age: 31	gender: m
GSM545663	vad status: unsupported	disease status: none	vad: none	age: 23	gender: m
GSM545664	vad status: unsupported	disease status: none	vad: none	age: 23	gender: f
GSM545665	vad status: before VAD support	disease status: dilated cardiomyopathy	vad: Novacor	age: 32	gender: m
GSM545666	vad status: before VAD support	disease status: dilated cardiomyopathy	vad: Thoratec	age: 40	gender: m
GSM545667	vad status: before VAD support	disease status: dilated cardiomyopathy	vad: Heartmate I	age: 59	gender: m
GSM545668	vad status: before VAD support	disease status: dilated cardiomyopathy	vad: Novacor	age: 44	gender: m
GSM545669	vad status: before VAD support	disease status: dilated cardiomyopathy	vad: Thoratec (iVAD)	age: 59	gender: m
GSM545670	vad status: before VAD support	disease status: ischemic cardiomyopathy	vad: Heartmate I	age: 52	gender: m
GSM545671	vad status: before VAD support	disease status: dilated cardiomyopathy	vad: Novacor	age: 60	gender: f
GSM545672	vad status: before VAD support	disease status: ischemic cardiomyopathy	vad: Novacor	age: 66	gender: m
GSM545673	vad status: before VAD support	disease status: dilated cardiomyopathy	vad: CorAide	age: 65	gender: m
GSM545674	vad status: before VAD support	disease status: dilated cardiomyopathy	vad: DuraHeart	age: 55	gender: f
GSM545675	vad status: before VAD support	disease status: ischemic cardiomyopathy	vad: Heartmate I	age: 67	gender: m
GSM545676	vad status: before VAD support	disease status: ischemic cardiomyopathy	vad: Novacor	age: 52	gender: m
GSM545677	vad status: before VAD support	disease status: dilated cardiomyopathy	vad: DuraHeart	age: 44	gender: m
GSM545678	vad status: before VAD support	disease status: dilated cardiomyopathy	vad: Thoratec	age: 63	gender: m
GSM545679	vad status: before VAD support	disease status: ischemic cardiomyopathy	vad: Novacor	age: 63	gender: m
GSM545680	vad status: before VAD support	disease status: ischemic cardiomyopathy	vad: Incor	age: 43	gender: m
GSM545681	vad status: before VAD support	disease status: dilated cardiomyopathy	vad: Novacor	age: 16	gender: m
GSM545682	vad status: before VAD support	disease status: dilated cardiomyopathy	vad: Heartmate I	age: 56	gender: m
GSM545683	vad status: before VAD support	disease status: dilated cardiomyopathy	vad: DuraHeart	age: 40	gender: m
GSM545684	vad status: before VAD support	disease status: dilated cardiomyopathy	vad: Heartmate I	age: 59	gender: m
GSM545685	vad status: before VAD support	disease status: dilated cardiomyopathy	vad: Heartmate I	age: 45	gender: m
GSM545686	vad status: before VAD support	disease status: dilated cardiomyopathy	vad: Novacor	age: 58	gender: m
GSM545687	vad status: before VAD support	disease status: ischemic cardiomyopathy	vad: DuraHeart	age: 68	gender: m
GSM545688	vad status: before VAD support	disease status: dilated cardiomyopathy	vad: Heartmate I	age: 47	gender: m
GSM545689	vad status: before VAD support	disease status: dilated cardiomyopathy (VD)	vad: Heartmate I	age: 33	gender: m
GSM545690	vad status: before VAD support	disease status: dilated cardiomyopathy	vad: Thoratec (biVAD)	age: 50	gender: m
GSM545691	vad status: before VAD support	disease status: ischemic cardiomyopathy	vad: Heartmate I	age: 57	gender: m
GSM545692	vad status: before VAD support	disease status: dilated cardiomyopathy	vad: Novacor	age: 66	gender: m
GSM545693	vad status: before VAD support	disease status: dilated cardiomyopathy	vad: CorAide	age: 29	gender: m
GSM545694	vad status: before VAD support	disease status: ischemic cardiomyopathy	vad: DuraHeart	age: 50	gender: m
GSM545695	vad status: after VAD support	disease status: dilated cardiomyopathy	vad: Novacor	age: 32	gender: m
GSM545696	vad status: after VAD support	disease status: dilated cardiomyopathy	vad: Thoratec	age: 40	gender: m
GSM545697	vad status: after VAD support	disease status: dilated cardiomyopathy	vad: Heartmate I	age: 59	gender: m
GSM545698	vad status: after VAD support	disease status: dilated cardiomyopathy	vad: Novacor	age: 44	gender: m
GSM545699	vad status: after VAD support	disease status: dilated cardiomyopathy	vad: Thoratec (iVAD)	age: 59	gender: m
GSM545700	vad status: after VAD support	disease status: ischemic cardiomyopathy	vad: Heartmate I	age: 52	gender: m
GSM545701	vad status: after VAD support	disease status: dilated cardiomyopathy	vad: Novacor	age: 60	gender: f
GSM545702	vad status: after VAD support	disease status: ischemic cardiomyopathy	vad: Novacor	age: 66	gender: m
GSM545703	vad status: after VAD support	disease status: dilated cardiomyopathy	vad: CorAide	age: 65	gender: m
GSM545704	vad status: after VAD support	disease status: dilated cardiomyopathy	vad: DuraHeart	age: 55	gender: f
GSM545705	vad status: after VAD support	disease status: ischemic cardiomyopathy	vad: Heartmate I	age: 67	gender: m
GSM545706	vad status: after VAD support	disease status: ischemic cardiomyopathy	vad: Novacor	age: 52	gender: m
GSM545707	vad status: after VAD support	disease status: dilated cardiomyopathy	vad: DuraHeart	age: 44	gender: m
GSM545708	vad status: after VAD support	disease status: dilated cardiomyopathy	vad: Thoratec	age: 63	gender: m
GSM545709	vad status: after VAD support	disease status: ischemic cardiomyopathy	vad: Novacor	age: 63	gender: m
GSM545710	vad status: after VAD support	disease status: ischemic cardiomyopathy	vad: Incor	age: 43	gender: m
GSM545711	vad status: after VAD support	disease status: dilated cardiomyopathy	vad: Novacor	age: 16	gender: m
GSM545712	vad status: after VAD support	disease status: dilated cardiomyopathy	vad: Heartmate I	age: 56	gender: m
GSM545713	vad status: after VAD support	disease status: dilated cardiomyopathy	vad: DuraHeart	age: 40	gender: m
GSM545714	vad status: after VAD support	disease status: dilated cardiomyopathy	vad: Heartmate I	age: 59	gender: m
GSM545715	vad status: after VAD support	disease status: dilated cardiomyopathy	vad: Heartmate I	age: 45	gender: m
GSM545716	vad status: after VAD support	disease status: dilated cardiomyopathy	vad: Novacor	age: 58	gender: m
GSM545717	vad status: after VAD support	disease status: ischemic cardiomyopathy	vad: DuraHeart	age: 68	gender: m
GSM545718	vad status: after VAD support	disease status: dilated cardiomyopathy	vad: Heartmate I	age: 47	gender: m
GSM545719	vad status: after VAD support	disease status: dilated cardiomyopathy (VD)	vad: Heartmate I	age: 33	gender: m
GSM545720	vad status: after VAD support	disease status: dilated cardiomyopathy	vad: Thoratec (biVAD)	age: 50	gender: m
GSM545721	vad status: after VAD support	disease status: ischemic cardiomyopathy	vad: Heartmate I	age: 57	gender: m
GSM545722	vad status: after VAD support	disease status: dilated cardiomyopathy	vad: Novacor	age: 66	gender: m
GSM545723	vad status: after VAD support	disease status: dilated cardiomyopathy	vad: CorAide	age: 29	gender: m
GSM545724	vad status: after VAD support	disease status: ischemic cardiomyopathy	vad: DuraHeart	age: 50	gender: m

## Sheet: GSE66360
id	type	!Sample_growth_protocol_ch1
GSM1620819	disease_status: Control	Arterial blood was collected from AMI patients into both EDTA containing (Becton Dickinson, Franklin Lakes, NJ, USA) and CellSave (Veridex, Raritan, NJ, USA) tubes in the cardiac catheterization laboratory following the placement of an arterial sheath prior to the introduction of any guide wires or coronary catheters. The samples were maintained at room temperature and processed within 36 hours o…
GSM1620820	disease_status: Control	Arterial blood was collected from AMI patients into both EDTA containing (Becton Dickinson, Franklin Lakes, NJ, USA) and CellSave (Veridex, Raritan, NJ, USA) tubes in the cardiac catheterization laboratory following the placement of an arterial sheath prior to the introduction of any guide wires or coronary catheters. The samples were maintained at room temperature and processed within 36 hours o…
GSM1620821	disease_status: Control	Arterial blood was collected from AMI patients into both EDTA containing (Becton Dickinson, Franklin Lakes, NJ, USA) and CellSave (Veridex, Raritan, NJ, USA) tubes in the cardiac catheterization laboratory following the placement of an arterial sheath prior to the introduction of any guide wires or coronary catheters. The samples were maintained at room temperature and processed within 36 hours o…
GSM1620822	disease_status: Control	Arterial blood was collected from AMI patients into both EDTA containing (Becton Dickinson, Franklin Lakes, NJ, USA) and CellSave (Veridex, Raritan, NJ, USA) tubes in the cardiac catheterization laboratory following the placement of an arterial sheath prior to the introduction of any guide wires or coronary catheters. The samples were maintained at room temperature and processed within 36 hours o…
GSM1620823	disease_status: Control	Arterial blood was collected from AMI patients into both EDTA containing (Becton Dickinson, Franklin Lakes, NJ, USA) and CellSave (Veridex, Raritan, NJ, USA) tubes in the cardiac catheterization laboratory following the placement of an arterial sheath prior to the introduction of any guide wires or coronary catheters. The samples were maintained at room temperature and processed within 36 hours o…
GSM1620824	disease_status: Control	Arterial blood was collected from AMI patients into both EDTA containing (Becton Dickinson, Franklin Lakes, NJ, USA) and CellSave (Veridex, Raritan, NJ, USA) tubes in the cardiac catheterization laboratory following the placement of an arterial sheath prior to the introduction of any guide wires or coronary catheters. The samples were maintained at room temperature and processed within 36 hours o…
GSM1620825	disease_status: Control	Arterial blood was collected from AMI patients into both EDTA containing (Becton Dickinson, Franklin Lakes, NJ, USA) and CellSave (Veridex, Raritan, NJ, USA) tubes in the cardiac catheterization laboratory following the placement of an arterial sheath prior to the introduction of any guide wires or coronary catheters. The samples were maintained at room temperature and processed within 36 hours o…
GSM1620826	disease_status: Control	Arterial blood was collected from AMI patients into both EDTA containing (Becton Dickinson, Franklin Lakes, NJ, USA) and CellSave (Veridex, Raritan, NJ, USA) tubes in the cardiac catheterization laboratory following the placement of an arterial sheath prior to the introduction of any guide wires or coronary catheters. The samples were maintained at room temperature and processed within 36 hours o…
GSM1620827	disease_status: Control	Arterial blood was collected from AMI patients into both EDTA containing (Becton Dickinson, Franklin Lakes, NJ, USA) and CellSave (Veridex, Raritan, NJ, USA) tubes in the cardiac catheterization laboratory following the placement of an arterial sheath prior to the introduction of any guide wires or coronary catheters. The samples were maintained at room temperature and processed within 36 hours o…
GSM1620828	disease_status: Control	Arterial blood was collected from AMI patients into both EDTA containing (Becton Dickinson, Franklin Lakes, NJ, USA) and CellSave (Veridex, Raritan, NJ, USA) tubes in the cardiac catheterization laboratory following the placement of an arterial sheath prior to the introduction of any guide wires or coronary catheters. The samples were maintained at room temperature and processed within 36 hours o…
GSM1620829	disease_status: Control	Arterial blood was collected from AMI patients into both EDTA containing (Becton Dickinson, Franklin Lakes, NJ, USA) and CellSave (Veridex, Raritan, NJ, USA) tubes in the cardiac catheterization laboratory following the placement of an arterial sheath prior to the introduction of any guide wires or coronary catheters. The samples were maintained at room temperature and processed within 36 hours o…
GSM1620830	disease_status: Control	Arterial blood was collected from AMI patients into both EDTA containing (Becton Dickinson, Franklin Lakes, NJ, USA) and CellSave (Veridex, Raritan, NJ, USA) tubes in the cardiac catheterization laboratory following the placement of an arterial sheath prior to the introduction of any guide wires or coronary catheters. The samples were maintained at room temperature and processed within 36 hours o…
GSM1620831	disease_status: Control	Arterial blood was collected from AMI patients into both EDTA containing (Becton Dickinson, Franklin Lakes, NJ, USA) and CellSave (Veridex, Raritan, NJ, USA) tubes in the cardiac catheterization laboratory following the placement of an arterial sheath prior to the introduction of any guide wires or coronary catheters. The samples were maintained at room temperature and processed within 36 hours o…
GSM1620853	disease_status: Control	Arterial blood was collected from AMI patients into both EDTA containing (Becton Dickinson, Franklin Lakes, NJ, USA) and CellSave (Veridex, Raritan, NJ, USA) tubes in the cardiac catheterization laboratory following the placement of an arterial sheath prior to the introduction of any guide wires or coronary catheters. The samples were maintained at room temperature and processed within 36 hours o…
GSM1620854	disease_status: Control	Arterial blood was collected from AMI patients into both EDTA containing (Becton Dickinson, Franklin Lakes, NJ, USA) and CellSave (Veridex, Raritan, NJ, USA) tubes in the cardiac catheterization laboratory following the placement of an arterial sheath prior to the introduction of any guide wires or coronary catheters. The samples were maintained at room temperature and processed within 36 hours o…
GSM1620855	disease_status: Control	Arterial blood was collected from AMI patients into both EDTA containing (Becton Dickinson, Franklin Lakes, NJ, USA) and CellSave (Veridex, Raritan, NJ, USA) tubes in the cardiac catheterization laboratory following the placement of an arterial sheath prior to the introduction of any guide wires or coronary catheters. The samples were maintained at room temperature and processed within 36 hours o…
GSM1620856	disease_status: Control	Arterial blood was collected from AMI patients into both EDTA containing (Becton Dickinson, Franklin Lakes, NJ, USA) and CellSave (Veridex, Raritan, NJ, USA) tubes in the cardiac catheterization laboratory following the placement of an arterial sheath prior to the introduction of any guide wires or coronary catheters. The samples were maintained at room temperature and processed within 36 hours o…
GSM1620857	disease_status: Control	Arterial blood was collected from AMI patients into both EDTA containing (Becton Dickinson, Franklin Lakes, NJ, USA) and CellSave (Veridex, Raritan, NJ, USA) tubes in the cardiac catheterization laboratory following the placement of an arterial sheath prior to the introduction of any guide wires or coronary catheters. The samples were maintained at room temperature and processed within 36 hours o…
GSM1620858	disease_status: Control	Arterial blood was collected from AMI patients into both EDTA containing (Becton Dickinson, Franklin Lakes, NJ, USA) and CellSave (Veridex, Raritan, NJ, USA) tubes in the cardiac catheterization laboratory following the placement of an arterial sheath prior to the introduction of any guide wires or coronary catheters. The samples were maintained at room temperature and processed within 36 hours o…
GSM1620859	disease_status: Control	Arterial blood was collected from AMI patients into both EDTA containing (Becton Dickinson, Franklin Lakes, NJ, USA) and CellSave (Veridex, Raritan, NJ, USA) tubes in the cardiac catheterization laboratory following the placement of an arterial sheath prior to the introduction of any guide wires or coronary catheters. The samples were maintained at room temperature and processed within 36 hours o…
GSM1620860	disease_status: Control	Arterial blood was collected from AMI patients into both EDTA containing (Becton Dickinson, Franklin Lakes, NJ, USA) and CellSave (Veridex, Raritan, NJ, USA) tubes in the cardiac catheterization laboratory following the placement of an arterial sheath prior to the introduction of any guide wires or coronary catheters. The samples were maintained at room temperature and processed within 36 hours o…
GSM1620861	disease_status: Control	Arterial blood was collected from AMI patients into both EDTA containing (Becton Dickinson, Franklin Lakes, NJ, USA) and CellSave (Veridex, Raritan, NJ, USA) tubes in the cardiac catheterization laboratory following the placement of an arterial sheath prior to the introduction of any guide wires or coronary catheters. The samples were maintained at room temperature and processed within 36 hours o…
GSM1620862	disease_status: Control	Arterial blood was collected from AMI patients into both EDTA containing (Becton Dickinson, Franklin Lakes, NJ, USA) and CellSave (Veridex, Raritan, NJ, USA) tubes in the cardiac catheterization laboratory following the placement of an arterial sheath prior to the introduction of any guide wires or coronary catheters. The samples were maintained at room temperature and processed within 36 hours o…
GSM1620863	disease_status: Control	Arterial blood was collected from AMI patients into both EDTA containing (Becton Dickinson, Franklin Lakes, NJ, USA) and CellSave (Veridex, Raritan, NJ, USA) tubes in the cardiac catheterization laboratory following the placement of an arterial sheath prior to the introduction of any guide wires or coronary catheters. The samples were maintained at room temperature and processed within 36 hours o…
GSM1620864	disease_status: Control	Arterial blood was collected from AMI patients into both EDTA containing (Becton Dickinson, Franklin Lakes, NJ, USA) and CellSave (Veridex, Raritan, NJ, USA) tubes in the cardiac catheterization laboratory following the placement of an arterial sheath prior to the introduction of any guide wires or coronary catheters. The samples were maintained at room temperature and processed within 36 hours o…
GSM1620865	disease_status: Control	Arterial blood was collected from AMI patients into both EDTA containing (Becton Dickinson, Franklin Lakes, NJ, USA) and CellSave (Veridex, Raritan, NJ, USA) tubes in the cardiac catheterization laboratory following the placement of an arterial sheath prior to the introduction of any guide wires or coronary catheters. The samples were maintained at room temperature and processed within 36 hours o…
GSM1620866	disease_status: Control	Arterial blood was collected from AMI patients into both EDTA containing (Becton Dickinson, Franklin Lakes, NJ, USA) and CellSave (Veridex, Raritan, NJ, USA) tubes in the cardiac catheterization laboratory following the placement of an arterial sheath prior to the introduction of any guide wires or coronary catheters. The samples were maintained at room temperature and processed within 36 hours o…
GSM1620867	disease_status: Control	Arterial blood was collected from AMI patients into both EDTA containing (Becton Dickinson, Franklin Lakes, NJ, USA) and CellSave (Veridex, Raritan, NJ, USA) tubes in the cardiac catheterization laboratory following the placement of an arterial sheath prior to the introduction of any guide wires or coronary catheters. The samples were maintained at room temperature and processed within 36 hours o…
GSM1620868	disease_status: Control	Arterial blood was collected from AMI patients into both EDTA containing (Becton Dickinson, Franklin Lakes, NJ, USA) and CellSave (Veridex, Raritan, NJ, USA) tubes in the cardiac catheterization laboratory following the placement of an arterial sheath prior to the introduction of any guide wires or coronary catheters. The samples were maintained at room temperature and processed within 36 hours o…
GSM1620869	disease_status: Control	Arterial blood was collected from AMI patients into both EDTA containing (Becton Dickinson, Franklin Lakes, NJ, USA) and CellSave (Veridex, Raritan, NJ, USA) tubes in the cardiac catheterization laboratory following the placement of an arterial sheath prior to the introduction of any guide wires or coronary catheters. The samples were maintained at room temperature and processed within 36 hours o…
GSM1620870	disease_status: Control	Arterial blood was collected from AMI patients into both EDTA containing (Becton Dickinson, Franklin Lakes, NJ, USA) and CellSave (Veridex, Raritan, NJ, USA) tubes in the cardiac catheterization laboratory following the placement of an arterial sheath prior to the introduction of any guide wires or coronary catheters. The samples were maintained at room temperature and processed within 36 hours o…
GSM1620871	disease_status: Control	Arterial blood was collected from AMI patients into both EDTA containing (Becton Dickinson, Franklin Lakes, NJ, USA) and CellSave (Veridex, Raritan, NJ, USA) tubes in the cardiac catheterization laboratory following the placement of an arterial sheath prior to the introduction of any guide wires or coronary catheters. The samples were maintained at room temperature and processed within 36 hours o…
GSM1620872	disease_status: Control	Arterial blood was collected from AMI patients into both EDTA containing (Becton Dickinson, Franklin Lakes, NJ, USA) and CellSave (Veridex, Raritan, NJ, USA) tubes in the cardiac catheterization laboratory following the placement of an arterial sheath prior to the introduction of any guide wires or coronary catheters. The samples were maintained at room temperature and processed within 36 hours o…
GSM1620873	disease_status: Control	Arterial blood was collected from AMI patients into both EDTA containing (Becton Dickinson, Franklin Lakes, NJ, USA) and CellSave (Veridex, Raritan, NJ, USA) tubes in the cardiac catheterization laboratory following the placement of an arterial sheath prior to the introduction of any guide wires or coronary catheters. The samples were maintained at room temperature and processed within 36 hours o…
GSM1620874	disease_status: Control	Arterial blood was collected from AMI patients into both EDTA containing (Becton Dickinson, Franklin Lakes, NJ, USA) and CellSave (Veridex, Raritan, NJ, USA) tubes in the cardiac catheterization laboratory following the placement of an arterial sheath prior to the introduction of any guide wires or coronary catheters. The samples were maintained at room temperature and processed within 36 hours o…
GSM1620875	disease_status: Control	Arterial blood was collected from AMI patients into both EDTA containing (Becton Dickinson, Franklin Lakes, NJ, USA) and CellSave (Veridex, Raritan, NJ, USA) tubes in the cardiac catheterization laboratory following the placement of an arterial sheath prior to the introduction of any guide wires or coronary catheters. The samples were maintained at room temperature and processed within 36 hours o…
GSM1620876	disease_status: Control	Arterial blood was collected from AMI patients into both EDTA containing (Becton Dickinson, Franklin Lakes, NJ, USA) and CellSave (Veridex, Raritan, NJ, USA) tubes in the cardiac catheterization laboratory following the placement of an arterial sheath prior to the introduction of any guide wires or coronary catheters. The samples were maintained at room temperature and processed within 36 hours o…
GSM1620892	disease_status: Control	Arterial blood was collected from AMI patients into both EDTA containing (Becton Dickinson, Franklin Lakes, NJ, USA) and CellSave (Veridex, Raritan, NJ, USA) tubes in the cardiac catheterization laboratory following the placement of an arterial sheath prior to the introduction of any guide wires or coronary catheters. The samples were maintained at room temperature and processed within 36 hours o…
GSM1620893	disease_status: Control	Arterial blood was collected from AMI patients into both EDTA containing (Becton Dickinson, Franklin Lakes, NJ, USA) and CellSave (Veridex, Raritan, NJ, USA) tubes in the cardiac catheterization laboratory following the placement of an arterial sheath prior to the introduction of any guide wires or coronary catheters. The samples were maintained at room temperature and processed within 36 hours o…
GSM1620894	disease_status: Control	Arterial blood was collected from AMI patients into both EDTA containing (Becton Dickinson, Franklin Lakes, NJ, USA) and CellSave (Veridex, Raritan, NJ, USA) tubes in the cardiac catheterization laboratory following the placement of an arterial sheath prior to the introduction of any guide wires or coronary catheters. The samples were maintained at room temperature and processed within 36 hours o…
GSM1620895	disease_status: Control	Arterial blood was collected from AMI patients into both EDTA containing (Becton Dickinson, Franklin Lakes, NJ, USA) and CellSave (Veridex, Raritan, NJ, USA) tubes in the cardiac catheterization laboratory following the placement of an arterial sheath prior to the introduction of any guide wires or coronary catheters. The samples were maintained at room temperature and processed within 36 hours o…
GSM1620896	disease_status: Control	Arterial blood was collected from AMI patients into both EDTA containing (Becton Dickinson, Franklin Lakes, NJ, USA) and CellSave (Veridex, Raritan, NJ, USA) tubes in the cardiac catheterization laboratory following the placement of an arterial sheath prior to the introduction of any guide wires or coronary catheters. The samples were maintained at room temperature and processed within 36 hours o…
GSM1620897	disease_status: Control	Arterial blood was collected from AMI patients into both EDTA containing (Becton Dickinson, Franklin Lakes, NJ, USA) and CellSave (Veridex, Raritan, NJ, USA) tubes in the cardiac catheterization laboratory following the placement of an arterial sheath prior to the introduction of any guide wires or coronary catheters. The samples were maintained at room temperature and processed within 36 hours o…
GSM1620898	disease_status: Control	Arterial blood was collected from AMI patients into both EDTA containing (Becton Dickinson, Franklin Lakes, NJ, USA) and CellSave (Veridex, Raritan, NJ, USA) tubes in the cardiac catheterization laboratory following the placement of an arterial sheath prior to the introduction of any guide wires or coronary catheters. The samples were maintained at room temperature and processed within 36 hours o…
GSM1620899	disease_status: Control	Arterial blood was collected from AMI patients into both EDTA containing (Becton Dickinson, Franklin Lakes, NJ, USA) and CellSave (Veridex, Raritan, NJ, USA) tubes in the cardiac catheterization laboratory following the placement of an arterial sheath prior to the introduction of any guide wires or coronary catheters. The samples were maintained at room temperature and processed within 36 hours o…
GSM1620900	disease_status: Control	Arterial blood was collected from AMI patients into both EDTA containing (Becton Dickinson, Franklin Lakes, NJ, USA) and CellSave (Veridex, Raritan, NJ, USA) tubes in the cardiac catheterization laboratory following the placement of an arterial sheath prior to the introduction of any guide wires or coronary catheters. The samples were maintained at room temperature and processed within 36 hours o…
GSM1620901	disease_status: Control	Arterial blood was collected from AMI patients into both EDTA containing (Becton Dickinson, Franklin Lakes, NJ, USA) and CellSave (Veridex, Raritan, NJ, USA) tubes in the cardiac catheterization laboratory following the placement of an arterial sheath prior to the introduction of any guide wires or coronary catheters. The samples were maintained at room temperature and processed within 36 hours o…
GSM1620902	disease_status: Control	Arterial blood was collected from AMI patients into both EDTA containing (Becton Dickinson, Franklin Lakes, NJ, USA) and CellSave (Veridex, Raritan, NJ, USA) tubes in the cardiac catheterization laboratory following the placement of an arterial sheath prior to the introduction of any guide wires or coronary catheters. The samples were maintained at room temperature and processed within 36 hours o…
GSM1620903	disease_status: Control	Arterial blood was collected from AMI patients into both EDTA containing (Becton Dickinson, Franklin Lakes, NJ, USA) and CellSave (Veridex, Raritan, NJ, USA) tubes in the cardiac catheterization laboratory following the placement of an arterial sheath prior to the introduction of any guide wires or coronary catheters. The samples were maintained at room temperature and processed within 36 hours o…
GSM1620904	disease_status: Control	Arterial blood was collected from AMI patients into both EDTA containing (Becton Dickinson, Franklin Lakes, NJ, USA) and CellSave (Veridex, Raritan, NJ, USA) tubes in the cardiac catheterization laboratory following the placement of an arterial sheath prior to the introduction of any guide wires or coronary catheters. The samples were maintained at room temperature and processed within 36 hours o…
GSM1620832	disease_status: Myocardial Infarction	Arterial blood was collected from AMI patients into both EDTA containing (Becton Dickinson, Franklin Lakes, NJ, USA) and CellSave (Veridex, Raritan, NJ, USA) tubes in the cardiac catheterization laboratory following the placement of an arterial sheath prior to the introduction of any guide wires or coronary catheters. The samples were maintained at room temperature and processed within 36 hours o…
GSM1620833	disease_status: Myocardial Infarction	Arterial blood was collected from AMI patients into both EDTA containing (Becton Dickinson, Franklin Lakes, NJ, USA) and CellSave (Veridex, Raritan, NJ, USA) tubes in the cardiac catheterization laboratory following the placement of an arterial sheath prior to the introduction of any guide wires or coronary catheters. The samples were maintained at room temperature and processed within 36 hours o…
GSM1620834	disease_status: Myocardial Infarction	Arterial blood was collected from AMI patients into both EDTA containing (Becton Dickinson, Franklin Lakes, NJ, USA) and CellSave (Veridex, Raritan, NJ, USA) tubes in the cardiac catheterization laboratory following the placement of an arterial sheath prior to the introduction of any guide wires or coronary catheters. The samples were maintained at room temperature and processed within 36 hours o…
GSM1620835	disease_status: Myocardial Infarction	Arterial blood was collected from AMI patients into both EDTA containing (Becton Dickinson, Franklin Lakes, NJ, USA) and CellSave (Veridex, Raritan, NJ, USA) tubes in the cardiac catheterization laboratory following the placement of an arterial sheath prior to the introduction of any guide wires or coronary catheters. The samples were maintained at room temperature and processed within 36 hours o…
GSM1620836	disease_status: Myocardial Infarction	Arterial blood was collected from AMI patients into both EDTA containing (Becton Dickinson, Franklin Lakes, NJ, USA) and CellSave (Veridex, Raritan, NJ, USA) tubes in the cardiac catheterization laboratory following the placement of an arterial sheath prior to the introduction of any guide wires or coronary catheters. The samples were maintained at room temperature and processed within 36 hours o…
GSM1620837	disease_status: Myocardial Infarction	Arterial blood was collected from AMI patients into both EDTA containing (Becton Dickinson, Franklin Lakes, NJ, USA) and CellSave (Veridex, Raritan, NJ, USA) tubes in the cardiac catheterization laboratory following the placement of an arterial sheath prior to the introduction of any guide wires or coronary catheters. The samples were maintained at room temperature and processed within 36 hours o…
GSM1620838	disease_status: Myocardial Infarction	Arterial blood was collected from AMI patients into both EDTA containing (Becton Dickinson, Franklin Lakes, NJ, USA) and CellSave (Veridex, Raritan, NJ, USA) tubes in the cardiac catheterization laboratory following the placement of an arterial sheath prior to the introduction of any guide wires or coronary catheters. The samples were maintained at room temperature and processed within 36 hours o…
GSM1620839	disease_status: Myocardial Infarction	Arterial blood was collected from AMI patients into both EDTA containing (Becton Dickinson, Franklin Lakes, NJ, USA) and CellSave (Veridex, Raritan, NJ, USA) tubes in the cardiac catheterization laboratory following the placement of an arterial sheath prior to the introduction of any guide wires or coronary catheters. The samples were maintained at room temperature and processed within 36 hours o…
GSM1620840	disease_status: Myocardial Infarction	Arterial blood was collected from AMI patients into both EDTA containing (Becton Dickinson, Franklin Lakes, NJ, USA) and CellSave (Veridex, Raritan, NJ, USA) tubes in the cardiac catheterization laboratory following the placement of an arterial sheath prior to the introduction of any guide wires or coronary catheters. The samples were maintained at room temperature and processed within 36 hours o…
GSM1620841	disease_status: Myocardial Infarction	Arterial blood was collected from AMI patients into both EDTA containing (Becton Dickinson, Franklin Lakes, NJ, USA) and CellSave (Veridex, Raritan, NJ, USA) tubes in the cardiac catheterization laboratory following the placement of an arterial sheath prior to the introduction of any guide wires or coronary catheters. The samples were maintained at room temperature and processed within 36 hours o…
GSM1620842	disease_status: Myocardial Infarction	Arterial blood was collected from AMI patients into both EDTA containing (Becton Dickinson, Franklin Lakes, NJ, USA) and CellSave (Veridex, Raritan, NJ, USA) tubes in the cardiac catheterization laboratory following the placement of an arterial sheath prior to the introduction of any guide wires or coronary catheters. The samples were maintained at room temperature and processed within 36 hours o…
GSM1620843	disease_status: Myocardial Infarction	Arterial blood was collected from AMI patients into both EDTA containing (Becton Dickinson, Franklin Lakes, NJ, USA) and CellSave (Veridex, Raritan, NJ, USA) tubes in the cardiac catheterization laboratory following the placement of an arterial sheath prior to the introduction of any guide wires or coronary catheters. The samples were maintained at room temperature and processed within 36 hours o…
GSM1620844	disease_status: Myocardial Infarction	Arterial blood was collected from AMI patients into both EDTA containing (Becton Dickinson, Franklin Lakes, NJ, USA) and CellSave (Veridex, Raritan, NJ, USA) tubes in the cardiac catheterization laboratory following the placement of an arterial sheath prior to the introduction of any guide wires or coronary catheters. The samples were maintained at room temperature and processed within 36 hours o…
GSM1620845	disease_status: Myocardial Infarction	Arterial blood was collected from AMI patients into both EDTA containing (Becton Dickinson, Franklin Lakes, NJ, USA) and CellSave (Veridex, Raritan, NJ, USA) tubes in the cardiac catheterization laboratory following the placement of an arterial sheath prior to the introduction of any guide wires or coronary catheters. The samples were maintained at room temperature and processed within 36 hours o…
GSM1620846	disease_status: Myocardial Infarction	Arterial blood was collected from AMI patients into both EDTA containing (Becton Dickinson, Franklin Lakes, NJ, USA) and CellSave (Veridex, Raritan, NJ, USA) tubes in the cardiac catheterization laboratory following the placement of an arterial sheath prior to the introduction of any guide wires or coronary catheters. The samples were maintained at room temperature and processed within 36 hours o…
GSM1620847	disease_status: Myocardial Infarction	Arterial blood was collected from AMI patients into both EDTA containing (Becton Dickinson, Franklin Lakes, NJ, USA) and CellSave (Veridex, Raritan, NJ, USA) tubes in the cardiac catheterization laboratory following the placement of an arterial sheath prior to the introduction of any guide wires or coronary catheters. The samples were maintained at room temperature and processed within 36 hours o…
GSM1620848	disease_status: Myocardial Infarction	Arterial blood was collected from AMI patients into both EDTA containing (Becton Dickinson, Franklin Lakes, NJ, USA) and CellSave (Veridex, Raritan, NJ, USA) tubes in the cardiac catheterization laboratory following the placement of an arterial sheath prior to the introduction of any guide wires or coronary catheters. The samples were maintained at room temperature and processed within 36 hours o…
GSM1620849	disease_status: Myocardial Infarction	Arterial blood was collected from AMI patients into both EDTA containing (Becton Dickinson, Franklin Lakes, NJ, USA) and CellSave (Veridex, Raritan, NJ, USA) tubes in the cardiac catheterization laboratory following the placement of an arterial sheath prior to the introduction of any guide wires or coronary catheters. The samples were maintained at room temperature and processed within 36 hours o…
GSM1620850	disease_status: Myocardial Infarction	Arterial blood was collected from AMI patients into both EDTA containing (Becton Dickinson, Franklin Lakes, NJ, USA) and CellSave (Veridex, Raritan, NJ, USA) tubes in the cardiac catheterization laboratory following the placement of an arterial sheath prior to the introduction of any guide wires or coronary catheters. The samples were maintained at room temperature and processed within 36 hours o…
GSM1620851	disease_status: Myocardial Infarction	Arterial blood was collected from AMI patients into both EDTA containing (Becton Dickinson, Franklin Lakes, NJ, USA) and CellSave (Veridex, Raritan, NJ, USA) tubes in the cardiac catheterization laboratory following the placement of an arterial sheath prior to the introduction of any guide wires or coronary catheters. The samples were maintained at room temperature and processed within 36 hours o…
GSM1620852	disease_status: Myocardial Infarction	Arterial blood was collected from AMI patients into both EDTA containing (Becton Dickinson, Franklin Lakes, NJ, USA) and CellSave (Veridex, Raritan, NJ, USA) tubes in the cardiac catheterization laboratory following the placement of an arterial sheath prior to the introduction of any guide wires or coronary catheters. The samples were maintained at room temperature and processed within 36 hours o…
GSM1620877	disease_status: Myocardial Infarction	Arterial blood was collected from AMI patients into both EDTA containing (Becton Dickinson, Franklin Lakes, NJ, USA) and CellSave (Veridex, Raritan, NJ, USA) tubes in the cardiac catheterization laboratory following the placement of an arterial sheath prior to the introduction of any guide wires or coronary catheters. The samples were maintained at room temperature and processed within 36 hours o…
GSM1620878	disease_status: Myocardial Infarction	Arterial blood was collected from AMI patients into both EDTA containing (Becton Dickinson, Franklin Lakes, NJ, USA) and CellSave (Veridex, Raritan, NJ, USA) tubes in the cardiac catheterization laboratory following the placement of an arterial sheath prior to the introduction of any guide wires or coronary catheters. The samples were maintained at room temperature and processed within 36 hours o…
GSM1620879	disease_status: Myocardial Infarction	Arterial blood was collected from AMI patients into both EDTA containing (Becton Dickinson, Franklin Lakes, NJ, USA) and CellSave (Veridex, Raritan, NJ, USA) tubes in the cardiac catheterization laboratory following the placement of an arterial sheath prior to the introduction of any guide wires or coronary catheters. The samples were maintained at room temperature and processed within 36 hours o…
GSM1620880	disease_status: Myocardial Infarction	Arterial blood was collected from AMI patients into both EDTA containing (Becton Dickinson, Franklin Lakes, NJ, USA) and CellSave (Veridex, Raritan, NJ, USA) tubes in the cardiac catheterization laboratory following the placement of an arterial sheath prior to the introduction of any guide wires or coronary catheters. The samples were maintained at room temperature and processed within 36 hours o…
GSM1620881	disease_status: Myocardial Infarction	Arterial blood was collected from AMI patients into both EDTA containing (Becton Dickinson, Franklin Lakes, NJ, USA) and CellSave (Veridex, Raritan, NJ, USA) tubes in the cardiac catheterization laboratory following the placement of an arterial sheath prior to the introduction of any guide wires or coronary catheters. The samples were maintained at room temperature and processed within 36 hours o…
GSM1620882	disease_status: Myocardial Infarction	Arterial blood was collected from AMI patients into both EDTA containing (Becton Dickinson, Franklin Lakes, NJ, USA) and CellSave (Veridex, Raritan, NJ, USA) tubes in the cardiac catheterization laboratory following the placement of an arterial sheath prior to the introduction of any guide wires or coronary catheters. The samples were maintained at room temperature and processed within 36 hours o…
GSM1620883	disease_status: Myocardial Infarction	Arterial blood was collected from AMI patients into both EDTA containing (Becton Dickinson, Franklin Lakes, NJ, USA) and CellSave (Veridex, Raritan, NJ, USA) tubes in the cardiac catheterization laboratory following the placement of an arterial sheath prior to the introduction of any guide wires or coronary catheters. The samples were maintained at room temperature and processed within 36 hours o…
GSM1620884	disease_status: Myocardial Infarction	Arterial blood was collected from AMI patients into both EDTA containing (Becton Dickinson, Franklin Lakes, NJ, USA) and CellSave (Veridex, Raritan, NJ, USA) tubes in the cardiac catheterization laboratory following the placement of an arterial sheath prior to the introduction of any guide wires or coronary catheters. The samples were maintained at room temperature and processed within 36 hours o…
GSM1620885	disease_status: Myocardial Infarction	Arterial blood was collected from AMI patients into both EDTA containing (Becton Dickinson, Franklin Lakes, NJ, USA) and CellSave (Veridex, Raritan, NJ, USA) tubes in the cardiac catheterization laboratory following the placement of an arterial sheath prior to the introduction of any guide wires or coronary catheters. The samples were maintained at room temperature and processed within 36 hours o…
GSM1620886	disease_status: Myocardial Infarction	Arterial blood was collected from AMI patients into both EDTA containing (Becton Dickinson, Franklin Lakes, NJ, USA) and CellSave (Veridex, Raritan, NJ, USA) tubes in the cardiac catheterization laboratory following the placement of an arterial sheath prior to the introduction of any guide wires or coronary catheters. The samples were maintained at room temperature and processed within 36 hours o…
GSM1620887	disease_status: Myocardial Infarction	Arterial blood was collected from AMI patients into both EDTA containing (Becton Dickinson, Franklin Lakes, NJ, USA) and CellSave (Veridex, Raritan, NJ, USA) tubes in the cardiac catheterization laboratory following the placement of an arterial sheath prior to the introduction of any guide wires or coronary catheters. The samples were maintained at room temperature and processed within 36 hours o…
GSM1620888	disease_status: Myocardial Infarction	Arterial blood was collected from AMI patients into both EDTA containing (Becton Dickinson, Franklin Lakes, NJ, USA) and CellSave (Veridex, Raritan, NJ, USA) tubes in the cardiac catheterization laboratory following the placement of an arterial sheath prior to the introduction of any guide wires or coronary catheters. The samples were maintained at room temperature and processed within 36 hours o…
GSM1620889	disease_status: Myocardial Infarction	Arterial blood was collected from AMI patients into both EDTA containing (Becton Dickinson, Franklin Lakes, NJ, USA) and CellSave (Veridex, Raritan, NJ, USA) tubes in the cardiac catheterization laboratory following the placement of an arterial sheath prior to the introduction of any guide wires or coronary catheters. The samples were maintained at room temperature and processed within 36 hours o…
GSM1620890	disease_status: Myocardial Infarction	Arterial blood was collected from AMI patients into both EDTA containing (Becton Dickinson, Franklin Lakes, NJ, USA) and CellSave (Veridex, Raritan, NJ, USA) tubes in the cardiac catheterization laboratory following the placement of an arterial sheath prior to the introduction of any guide wires or coronary catheters. The samples were maintained at room temperature and processed within 36 hours o…
GSM1620891	disease_status: Myocardial Infarction	Arterial blood was collected from AMI patients into both EDTA containing (Becton Dickinson, Franklin Lakes, NJ, USA) and CellSave (Veridex, Raritan, NJ, USA) tubes in the cardiac catheterization laboratory following the placement of an arterial sheath prior to the introduction of any guide wires or coronary catheters. The samples were maintained at room temperature and processed within 36 hours o…
GSM1620905	disease_status: Myocardial Infarction	Arterial blood was collected from AMI patients into both EDTA containing (Becton Dickinson, Franklin Lakes, NJ, USA) and CellSave (Veridex, Raritan, NJ, USA) tubes in the cardiac catheterization laboratory following the placement of an arterial sheath prior to the introduction of any guide wires or coronary catheters. The samples were maintained at room temperature and processed within 36 hours o…
GSM1620906	disease_status: Myocardial Infarction	Arterial blood was collected from AMI patients into both EDTA containing (Becton Dickinson, Franklin Lakes, NJ, USA) and CellSave (Veridex, Raritan, NJ, USA) tubes in the cardiac catheterization laboratory following the placement of an arterial sheath prior to the introduction of any guide wires or coronary catheters. The samples were maintained at room temperature and processed within 36 hours o…
GSM1620907	disease_status: Myocardial Infarction	Arterial blood was collected from AMI patients into both EDTA containing (Becton Dickinson, Franklin Lakes, NJ, USA) and CellSave (Veridex, Raritan, NJ, USA) tubes in the cardiac catheterization laboratory following the placement of an arterial sheath prior to the introduction of any guide wires or coronary catheters. The samples were maintained at room temperature and processed within 36 hours o…
GSM1620908	disease_status: Myocardial Infarction	Arterial blood was collected from AMI patients into both EDTA containing (Becton Dickinson, Franklin Lakes, NJ, USA) and CellSave (Veridex, Raritan, NJ, USA) tubes in the cardiac catheterization laboratory following the placement of an arterial sheath prior to the introduction of any guide wires or coronary catheters. The samples were maintained at room temperature and processed within 36 hours o…
GSM1620909	disease_status: Myocardial Infarction	Arterial blood was collected from AMI patients into both EDTA containing (Becton Dickinson, Franklin Lakes, NJ, USA) and CellSave (Veridex, Raritan, NJ, USA) tubes in the cardiac catheterization laboratory following the placement of an arterial sheath prior to the introduction of any guide wires or coronary catheters. The samples were maintained at room temperature and processed within 36 hours o…
GSM1620910	disease_status: Myocardial Infarction	Arterial blood was collected from AMI patients into both EDTA containing (Becton Dickinson, Franklin Lakes, NJ, USA) and CellSave (Veridex, Raritan, NJ, USA) tubes in the cardiac catheterization laboratory following the placement of an arterial sheath prior to the introduction of any guide wires or coronary catheters. The samples were maintained at room temperature and processed within 36 hours o…
GSM1620911	disease_status: Myocardial Infarction	Arterial blood was collected from AMI patients into both EDTA containing (Becton Dickinson, Franklin Lakes, NJ, USA) and CellSave (Veridex, Raritan, NJ, USA) tubes in the cardiac catheterization laboratory following the placement of an arterial sheath prior to the introduction of any guide wires or coronary catheters. The samples were maintained at room temperature and processed within 36 hours o…
GSM1620912	disease_status: Myocardial Infarction	Arterial blood was collected from AMI patients into both EDTA containing (Becton Dickinson, Franklin Lakes, NJ, USA) and CellSave (Veridex, Raritan, NJ, USA) tubes in the cardiac catheterization laboratory following the placement of an arterial sheath prior to the introduction of any guide wires or coronary catheters. The samples were maintained at room temperature and processed within 36 hours o…
GSM1620913	disease_status: Myocardial Infarction	Arterial blood was collected from AMI patients into both EDTA containing (Becton Dickinson, Franklin Lakes, NJ, USA) and CellSave (Veridex, Raritan, NJ, USA) tubes in the cardiac catheterization laboratory following the placement of an arterial sheath prior to the introduction of any guide wires or coronary catheters. The samples were maintained at room temperature and processed within 36 hours o…
GSM1620914	disease_status: Myocardial Infarction	Arterial blood was collected from AMI patients into both EDTA containing (Becton Dickinson, Franklin Lakes, NJ, USA) and CellSave (Veridex, Raritan, NJ, USA) tubes in the cardiac catheterization laboratory following the placement of an arterial sheath prior to the introduction of any guide wires or coronary catheters. The samples were maintained at room temperature and processed within 36 hours o…
GSM1620915	disease_status: Myocardial Infarction	Arterial blood was collected from AMI patients into both EDTA containing (Becton Dickinson, Franklin Lakes, NJ, USA) and CellSave (Veridex, Raritan, NJ, USA) tubes in the cardiac catheterization laboratory following the placement of an arterial sheath prior to the introduction of any guide wires or coronary catheters. The samples were maintained at room temperature and processed within 36 hours o…
GSM1620916	disease_status: Myocardial Infarction	Arterial blood was collected from AMI patients into both EDTA containing (Becton Dickinson, Franklin Lakes, NJ, USA) and CellSave (Veridex, Raritan, NJ, USA) tubes in the cardiac catheterization laboratory following the placement of an arterial sheath prior to the introduction of any guide wires or coronary catheters. The samples were maintained at room temperature and processed within 36 hours o…
GSM1620917	disease_status: Myocardial Infarction	Arterial blood was collected from AMI patients into both EDTA containing (Becton Dickinson, Franklin Lakes, NJ, USA) and CellSave (Veridex, Raritan, NJ, USA) tubes in the cardiac catheterization laboratory following the placement of an arterial sheath prior to the introduction of any guide wires or coronary catheters. The samples were maintained at room temperature and processed within 36 hours o…

## Sheet: GSE120895
id	type
GSM3417936	condition: control
GSM3417937	condition: control
GSM3417938	condition: control
GSM3417939	condition: control
GSM3417940	condition: control
GSM3417941	condition: control
GSM3417942	condition: control
GSM3417943	condition: control
GSM3417944	condition: DCM with LV systolic dysfunction (LVEF < 45 percent) and symptoms of HF
GSM3417945	condition: DCM with LV systolic dysfunction (LVEF < 45 percent) and symptoms of HF
GSM3417946	condition: DCM with LV systolic dysfunction (LVEF < 45 percent) and symptoms of HF
GSM3417947	condition: DCM with LV systolic dysfunction (LVEF < 45 percent) and symptoms of HF
GSM3417948	condition: DCM with LV systolic dysfunction (LVEF < 45 percent) and symptoms of HF
GSM3417949	condition: DCM with LV systolic dysfunction (LVEF < 45 percent) and symptoms of HF
GSM3417950	condition: DCM with LV systolic dysfunction (LVEF < 45 percent) and symptoms of HF
GSM3417951	condition: DCM with LV systolic dysfunction (LVEF < 45 percent) and symptoms of HF
GSM3417952	condition: DCM with LV systolic dysfunction (LVEF < 45 percent) and symptoms of HF
GSM3417953	condition: DCM with LV systolic dysfunction (LVEF < 45 percent) and symptoms of HF
GSM3417954	condition: DCM with LV systolic dysfunction (LVEF < 45 percent) and symptoms of HF
GSM3417955	condition: DCM with LV systolic dysfunction (LVEF < 45 percent) and symptoms of HF
GSM3417956	condition: DCM with LV systolic dysfunction (LVEF < 45 percent) and symptoms of HF
GSM3417957	condition: DCM with LV systolic dysfunction (LVEF < 45 percent) and symptoms of HF
GSM3417958	condition: DCM with LV systolic dysfunction (LVEF < 45 percent) and symptoms of HF
GSM3417959	condition: DCM with LV systolic dysfunction (LVEF < 45 percent) and symptoms of HF
GSM3417960	condition: DCM with LV systolic dysfunction (LVEF < 45 percent) and symptoms of HF
GSM3417961	condition: DCM with LV systolic dysfunction (LVEF < 45 percent) and symptoms of HF
GSM3417962	condition: DCM with LV systolic dysfunction (LVEF < 45 percent) and symptoms of HF
GSM3417963	condition: DCM with LV systolic dysfunction (LVEF < 45 percent) and symptoms of HF
GSM3417964	condition: DCM with LV systolic dysfunction (LVEF < 45 percent) and symptoms of HF
GSM3417965	condition: DCM with LV systolic dysfunction (LVEF < 45 percent) and symptoms of HF
GSM3417966	condition: DCM with LV systolic dysfunction (LVEF < 45 percent) and symptoms of HF
GSM3417967	condition: DCM with LV systolic dysfunction (LVEF < 45 percent) and symptoms of HF
GSM3417968	condition: DCM with LV systolic dysfunction (LVEF < 45 percent) and symptoms of HF
GSM3417969	condition: DCM with LV systolic dysfunction (LVEF < 45 percent) and symptoms of HF
GSM3417970	condition: DCM with LV systolic dysfunction (LVEF < 45 percent) and symptoms of HF
GSM3417971	condition: DCM with LV systolic dysfunction (LVEF < 45 percent) and symptoms of HF
GSM3417972	condition: DCM with LV systolic dysfunction (LVEF < 45 percent) and symptoms of HF
GSM3417973	condition: DCM with LV systolic dysfunction (LVEF < 45 percent) and symptoms of HF
GSM3417974	condition: DCM with LV systolic dysfunction (LVEF < 45 percent) and symptoms of HF
GSM3417975	condition: DCM with LV systolic dysfunction (LVEF < 45 percent) and symptoms of HF
GSM3417976	condition: DCM with LV systolic dysfunction (LVEF < 45 percent) and symptoms of HF
GSM3417977	condition: DCM with LV systolic dysfunction (LVEF < 45 percent) and symptoms of HF
GSM3417978	condition: DCM with LV systolic dysfunction (LVEF < 45 percent) and symptoms of HF
GSM3417979	condition: DCM with LV systolic dysfunction (LVEF < 45 percent) and symptoms of HF
GSM3417980	condition: DCM with LV systolic dysfunction (LVEF < 45 percent) and symptoms of HF
GSM3417981	condition: DCM with LV systolic dysfunction (LVEF < 45 percent) and symptoms of HF
GSM3417982	condition: DCM with LV systolic dysfunction (LVEF < 45 percent) and symptoms of HF
GSM3417983	condition: DCM with LV systolic dysfunction (LVEF < 45 percent) and symptoms of HF
GSM3417984	condition: DCM with LV systolic dysfunction (LVEF < 45 percent) and symptoms of HF
GSM3417985	condition: DCM with LV systolic dysfunction (LVEF < 45 percent) and symptoms of HF
GSM3417986	condition: DCM with LV systolic dysfunction (LVEF < 45 percent) and symptoms of HF
GSM3417987	condition: DCM with LV systolic dysfunction (LVEF < 45 percent) and symptoms of HF
GSM3417988	condition: DCM with LV systolic dysfunction (LVEF < 45 percent) and symptoms of HF
GSM3417989	condition: DCM with LV systolic dysfunction (LVEF < 45 percent) and symptoms of HF
GSM3417990	condition: DCM with LV systolic dysfunction (LVEF < 45 percent) and symptoms of HF

## Sheet: GSE48060
id	type	protocol
GSM1167102	normal control	Blood samples were collected in EDTA tubes within 48-hours of acute myocardial infarction or following recruitment into the study. Nucleated cells were fractionated from 5 mL of heparinized blood.
GSM1167103	normal control	Blood samples were collected in EDTA tubes within 48-hours of acute myocardial infarction or following recruitment into the study. Nucleated cells were fractionated from 5 mL of heparinized blood.
GSM1167104	normal control	Blood samples were collected in EDTA tubes within 48-hours of acute myocardial infarction or following recruitment into the study. Nucleated cells were fractionated from 5 mL of heparinized blood.
GSM1167105	normal control	Blood samples were collected in EDTA tubes within 48-hours of acute myocardial infarction or following recruitment into the study. Nucleated cells were fractionated from 5 mL of heparinized blood.
GSM1167106	normal control	Blood samples were collected in EDTA tubes within 48-hours of acute myocardial infarction or following recruitment into the study. Nucleated cells were fractionated from 5 mL of heparinized blood.
GSM1167107	normal control	Blood samples were collected in EDTA tubes within 48-hours of acute myocardial infarction or following recruitment into the study. Nucleated cells were fractionated from 5 mL of heparinized blood.
GSM1167108	normal control	Blood samples were collected in EDTA tubes within 48-hours of acute myocardial infarction or following recruitment into the study. Nucleated cells were fractionated from 5 mL of heparinized blood.
GSM1167109	normal control	Blood samples were collected in EDTA tubes within 48-hours of acute myocardial infarction or following recruitment into the study. Nucleated cells were fractionated from 5 mL of heparinized blood.
GSM1167110	normal control	Blood samples were collected in EDTA tubes within 48-hours of acute myocardial infarction or following recruitment into the study. Nucleated cells were fractionated from 5 mL of heparinized blood.
GSM1167111	normal control	Blood samples were collected in EDTA tubes within 48-hours of acute myocardial infarction or following recruitment into the study. Nucleated cells were fractionated from 5 mL of heparinized blood.
GSM1167112	normal control	Blood samples were collected in EDTA tubes within 48-hours of acute myocardial infarction or following recruitment into the study. Nucleated cells were fractionated from 5 mL of heparinized blood.
GSM1167113	normal control	Blood samples were collected in EDTA tubes within 48-hours of acute myocardial infarction or following recruitment into the study. Nucleated cells were fractionated from 5 mL of heparinized blood.
GSM1167114	normal control	Blood samples were collected in EDTA tubes within 48-hours of acute myocardial infarction or following recruitment into the study. Nucleated cells were fractionated from 5 mL of heparinized blood.
GSM1167115	normal control	Blood samples were collected in EDTA tubes within 48-hours of acute myocardial infarction or following recruitment into the study. Nucleated cells were fractionated from 5 mL of heparinized blood.
GSM1167116	normal control	Blood samples were collected in EDTA tubes within 48-hours of acute myocardial infarction or following recruitment into the study. Nucleated cells were fractionated from 5 mL of heparinized blood.
GSM1167117	normal control	Blood samples were collected in EDTA tubes within 48-hours of acute myocardial infarction or following recruitment into the study. Nucleated cells were fractionated from 5 mL of heparinized blood.
GSM1167118	normal control	Blood samples were collected in EDTA tubes within 48-hours of acute myocardial infarction or following recruitment into the study. Nucleated cells were fractionated from 5 mL of heparinized blood.
GSM1167119	normal control	Blood samples were collected in EDTA tubes within 48-hours of acute myocardial infarction or following recruitment into the study. Nucleated cells were fractionated from 5 mL of heparinized blood.
GSM1167120	normal control	Blood samples were collected in EDTA tubes within 48-hours of acute myocardial infarction or following recruitment into the study. Nucleated cells were fractionated from 5 mL of heparinized blood.
GSM1167121	normal control	Blood samples were collected in EDTA tubes within 48-hours of acute myocardial infarction or following recruitment into the study. Nucleated cells were fractionated from 5 mL of heparinized blood.
GSM1167123	normal control	Blood samples were collected in EDTA tubes within 48-hours of acute myocardial infarction or following recruitment into the study. Nucleated cells were fractionated from 5 mL of heparinized blood.
GSM1167072	patient with recurrent events	Blood samples were collected in EDTA tubes within 48-hours of acute myocardial infarction or following recruitment into the study. Nucleated cells were fractionated from 5 mL of heparinized blood.
GSM1167078	patient with recurrent events	Blood samples were collected in EDTA tubes within 48-hours of acute myocardial infarction or following recruitment into the study. Nucleated cells were fractionated from 5 mL of heparinized blood.
GSM1167081	patient with recurrent events	Blood samples were collected in EDTA tubes within 48-hours of acute myocardial infarction or following recruitment into the study. Nucleated cells were fractionated from 5 mL of heparinized blood.
GSM1167088	patient with recurrent events	Blood samples were collected in EDTA tubes within 48-hours of acute myocardial infarction or following recruitment into the study. Nucleated cells were fractionated from 5 mL of heparinized blood.
GSM1167097	patient with recurrent events	Blood samples were collected in EDTA tubes within 48-hours of acute myocardial infarction or following recruitment into the study. Nucleated cells were fractionated from 5 mL of heparinized blood.
GSM1167073	patient without recurrent events	Blood samples were collected in EDTA tubes within 48-hours of acute myocardial infarction or following recruitment into the study. Nucleated cells were fractionated from 5 mL of heparinized blood.
GSM1167074	patient without recurrent events	Blood samples were collected in EDTA tubes within 48-hours of acute myocardial infarction or following recruitment into the study. Nucleated cells were fractionated from 5 mL of heparinized blood.
GSM1167075	patient without recurrent events	Blood samples were collected in EDTA tubes within 48-hours of acute myocardial infarction or following recruitment into the study. Nucleated cells were fractionated from 5 mL of heparinized blood.
GSM1167076	patient without recurrent events	Blood samples were collected in EDTA tubes within 48-hours of acute myocardial infarction or following recruitment into the study. Nucleated cells were fractionated from 5 mL of heparinized blood.
GSM1167077	patient without recurrent events	Blood samples were collected in EDTA tubes within 48-hours of acute myocardial infarction or following recruitment into the study. Nucleated cells were fractionated from 5 mL of heparinized blood.
GSM1167079	patient without recurrent events	Blood samples were collected in EDTA tubes within 48-hours of acute myocardial infarction or following recruitment into the study. Nucleated cells were fractionated from 5 mL of heparinized blood.
GSM1167080	patient without recurrent events	Blood samples were collected in EDTA tubes within 48-hours of acute myocardial infarction or following recruitment into the study. Nucleated cells were fractionated from 5 mL of heparinized blood.
GSM1167082	patient without recurrent events	Blood samples were collected in EDTA tubes within 48-hours of acute myocardial infarction or following recruitment into the study. Nucleated cells were fractionated from 5 mL of heparinized blood.
GSM1167083	patient without recurrent events	Blood samples were collected in EDTA tubes within 48-hours of acute myocardial infarction or following recruitment into the study. Nucleated cells were fractionated from 5 mL of heparinized blood.
GSM1167084	patient without recurrent events	Blood samples were collected in EDTA tubes within 48-hours of acute myocardial infarction or following recruitment into the study. Nucleated cells were fractionated from 5 mL of heparinized blood.
GSM1167085	patient without recurrent events	Blood samples were collected in EDTA tubes within 48-hours of acute myocardial infarction or following recruitment into the study. Nucleated cells were fractionated from 5 mL of heparinized blood.
GSM1167086	patient without recurrent events	Blood samples were collected in EDTA tubes within 48-hours of acute myocardial infarction or following recruitment into the study. Nucleated cells were fractionated from 5 mL of heparinized blood.
GSM1167087	patient without recurrent events	Blood samples were collected in EDTA tubes within 48-hours of acute myocardial infarction or following recruitment into the study. Nucleated cells were fractionated from 5 mL of heparinized blood.
GSM1167089	patient without recurrent events	Blood samples were collected in EDTA tubes within 48-hours of acute myocardial infarction or following recruitment into the study. Nucleated cells were fractionated from 5 mL of heparinized blood.
GSM1167090	patient without recurrent events	Blood samples were collected in EDTA tubes within 48-hours of acute myocardial infarction or following recruitment into the study. Nucleated cells were fractionated from 5 mL of heparinized blood.
GSM1167091	patient without recurrent events	Blood samples were collected in EDTA tubes within 48-hours of acute myocardial infarction or following recruitment into the study. Nucleated cells were fractionated from 5 mL of heparinized blood.
GSM1167092	patient without recurrent events	Blood samples were collected in EDTA tubes within 48-hours of acute myocardial infarction or following recruitment into the study. Nucleated cells were fractionated from 5 mL of heparinized blood.
GSM1167093	patient without recurrent events	Blood samples were collected in EDTA tubes within 48-hours of acute myocardial infarction or following recruitment into the study. Nucleated cells were fractionated from 5 mL of heparinized blood.
GSM1167094	patient without recurrent events	Blood samples were collected in EDTA tubes within 48-hours of acute myocardial infarction or following recruitment into the study. Nucleated cells were fractionated from 5 mL of heparinized blood.
GSM1167095	patient without recurrent events	Blood samples were collected in EDTA tubes within 48-hours of acute myocardial infarction or following recruitment into the study. Nucleated cells were fractionated from 5 mL of heparinized blood.
GSM1167096	patient without recurrent events	Blood samples were collected in EDTA tubes within 48-hours of acute myocardial infarction or following recruitment into the study. Nucleated cells were fractionated from 5 mL of heparinized blood.
GSM1167098	patient without recurrent events	Blood samples were collected in EDTA tubes within 48-hours of acute myocardial infarction or following recruitment into the study. Nucleated cells were fractionated from 5 mL of heparinized blood.
GSM1167099	patient without recurrent events	Blood samples were collected in EDTA tubes within 48-hours of acute myocardial infarction or following recruitment into the study. Nucleated cells were fractionated from 5 mL of heparinized blood.
GSM1167100	patient without recurrent events	Blood samples were collected in EDTA tubes within 48-hours of acute myocardial infarction or following recruitment into the study. Nucleated cells were fractionated from 5 mL of heparinized blood.
GSM1167101	patient without recurrent events	Blood samples were collected in EDTA tubes within 48-hours of acute myocardial infarction or following recruitment into the study. Nucleated cells were fractionated from 5 mL of heparinized blood.
GSM1167122	patient without recurrent events	Blood samples were collected in EDTA tubes within 48-hours of acute myocardial infarction or following recruitment into the study. Nucleated cells were fractionated from 5 mL of heparinized blood.
