# Supplementary material for: Identification of shared fatty acid metabolism related signatures in dilated cardiomyopathy and myocardial infarction
Source: Future Sci OA. 2023 Mar 28;9(3):FSO847. doi: 10.2144/fsoa-2023-0008 (PMC10088053; doi:10.2144/fsoa-2023-0008)
Supplement: Supplementary file 3 [file fsoa-09-847-s3.xlsx]

## Sheet: Sheet1
Drug	Gene	Interaction type	PMIDs
CHOLESTYRAMINE	CYP27A1	N/A	137699107
FENOFIBRATE	PPARA	agonist	3339
BEZAFIBRATE	PPARA	agonist	39042
K-877	PPARA	agonist	11526038
AVE8134	PPARA	agonist	11625114
RAGAGLITAZAR	PPARA	agonist	447458
CP-778875	PPARA	agonist	11532289
GEMFIBROZIL	PPARA	agonist	3463
ILOPROST	PPARA	activator	5311181
ALEGLITAZAR	PPARA	agonist	10274777
IMIGLITAZAR	PPARA	agonist	9890879
CLOFIBRATE	PPARA	agonist	2796
GW7647	PPARA	agonist	3392731
FENOFIBRIC ACID	PPARA	agonist	64929
ZYH7	PPARA	agonist	312467943
INDEGLITAZAR	PPARA	agonist	11395145
SODELGLITAZAR	PPARA	agonist	9805950
LY-518674	PPARA	agonist	135449333
CHOLINE FENOFIBRATE	PPARA	agonist	11350701
TESAGLITAZAR	PPARA	agonist	208901
CIPROFIBRATE	PPARA	agonist	2763
NAVEGLITAZAR	PPARA	agonist	9888484
GW590735	PPARA	agonist	9956726
DRF-10945	PPARA	agonist	312468244
MURAGLITAZAR	PPARA	agonist	198972613
GW501516	PPARA	agonist	404639794
IOXYNIL	PPARA	N/A	198971787
URSOLIC ACID	PPARA	N/A	348275801
PROSTAGLANDIN D2	PPARA	N/A	459165297
METFORMIN	PPARA	N/A	178101481
CHEMBL292352	PPARA	N/A	103242611
DISULFIRAM	ALDH2	inhibitor	3117
DIACETYLMORPHINE	ALDH2	N/A	5462328
ACETALDEHYDE	ALDH2	N/A	177
ALCOHOL	ALDH2	N/A	702
